# Supplementary material for: Exploring resveratrol dimers as virulence blocking agents – Attenuation of type III secretion in Yersinia pseudotuberculosis and Pseudomonas aeruginosa
Source: PubMed Central journal article supplement (PMC7005745; doi:10.1038/s41598-020-58872-0), 2020-02-07
Supplement: 41598_2020_58872_MOESM1_ESM.pdf [file 41598_2020_58872_MOESM1_ESM.pdf]

Exploring resveratrol dimers as virulence blocking agents –

Attenuation of type III secretion in *Yersinia pseudotuberculosis* and

*Pseudomonas aeruginosa*

Charlotta Sundin<sup>a\*</sup>, Caroline E. Zetterström<sup>a</sup>, Duc Duy Vo<sup>a</sup>, Robert Brkljača<sup>b</sup>, Sylvia Urban<sup>b</sup>  
and Mikael Elofsson<sup>a</sup>

<sup>a</sup> Department of Chemistry Umeå University, SE 901 87 Umeå, Sweden

<sup>b</sup> School of Science (Applied Chemistry and Environmental Science), RMIT University, GPO  
Box 2476 Melbourne, Victoria, 3001, Australia

e-mail address corresponding author: charlotta.sundin@umu.se

Sequence pCS500

>pCS500 Orf1, ExoS promoter, GFP 1682bp

TAGAGGATCCTCCTTTCGCCCCGACTGGGCTCAGCGTAGCTCTTCGGCGGCGGCGACCAAGTTGTTCCG  
AGTTGGTGGTGGATCTGGGCCCTGTCCAGCAACTGCAAGGGCTGGCGGTTCCAGAGCAGCCGTTCC  
GCCGCTTTCGGGGTACGGGCCAGGATCGGCTTGCAAGGGTCTGGCTGAACAGGTTCTGCTCGTT  
GGCCGTAGCGTCTCCTTGTCTTCCAGGCGGGTGAACATCAACAGGTGATCGGTCGGATGTTCTGC  
CAGATGGCAGAGATGCGGGCCACCTGCAGGCTGAGTACGCTCTCCTCGTCTGTTGGGCGTCGGGA  
GATCGAGAGCGAGAAAAAGCTGGTGGATGGCGGCGGGTAGAGTGGATTTCATGGCGTGTCCGA  
GTCACTGGAGGCAGCCATTAGAGCAGTGCCAGCCCGGAGAGACTGTTAATCGTGGTTCTCTTTTTTT  
AGTTTTTGCCGCTGCCGATTCAGTGAAAAACGGCGGCCAATCCTGATAGGCGATGGGGTTTTCCC  
GTTCTTAGACTGGCGGAGAAACATCAGGAGAAGGCAACCATCATGCAGATTAAAGAAGGAGATATA  
CATATGAGTAAAGGAGAAGAACTTTTCACTGGAGTTGTCCCAATTCCTTGTGAATTAGATGGTGATG  
TTAATGGGCACAAATTTTCTGTCAGTGGAGAGGGTGAAGGTGATGCAACATACGGAAAACCTTACCC  
TTAAATTTATTTGCACTACTGGAAAACCTACCTGTTCATGGCCAACACTTGTCACTACTTTTCGCGTAT  
GGTCTTCAATGCTTTGCGAGATACCCAGATCATATGAAACAGCATGACTTTTTCAAGAGTGCCATGC  
CCGAAGGTTATGTACAGGAAAGAACTATATTTTTTCAAAGATGACGGGAACTACAAGACACGTGCTG  
AAGTCAAGTTTGAAGGTGATGCCCTTGTTAATAGAATCGAGTTAAAAGGTATTGATTTTAAAGAAGA  
TGGAACATTTCTTGGACACAAATTTGGAATACAACATAACTCACACAATGTATAACATCATGGCAGAC  
AAACAAAAGAATGGAATCAAAGTTAACTTCAAAATTAGACACAACATTGAAGATGGAAGCGTTCAAC  
TAGCAGACCATTATCAACAAAATACTCCAATTGGCGATGGCCCTGTCTTTTACCAGACAACCATTAC  
CTGTCCACACAATCTGCCCTTTCGAAAGATCCCAACGAAAAGAGAGACCACATGGTCTTCTTGAGTT  
TGTAACAGCTGCTGGGATTACACATGGCATGGATGAGCTCTACAAATAGAATTCGTAATCATGTCAT  
AGCTGTTTCTGTGTGAAATTTGTTATCCGCTCACAATTCACACAACATACGAGCCGGAAGCATAAA  
GTGTAAGCCTGGGGTGCCTAATGAGTGAGCTAACTCACATTAATTGCGTTGCGTCACTGCCCGCT  
TTCCAGTCGGGAAACCTGTCGTGCCAGCTGCATTAATGAATCGGCCAACGCGCGGGGAGAGGGCGG  
TTTGCGTATTGGGCGCTCTTCCGCTTCTCGCTCACTGACTCGCTGCGCTCGGTCTGTTCCGGCTGCGG  
CGAGCGGTATCAGCTCACTCAAAGGCGGTAATACGGTTATCCACAGAATCAGGGGATAACGCAGGA  
AAGAACATGTGAGCAAAAGGC

Orf1 gene reverse transcription

AACGGCGGCCAATCCTGATA ExoSf21 primer

**ATGCAG** NsiI PstI site after ligation

**ATG** starting codon of ExoS

GFP gene

**GGATCC** BamHI site

**GAATTC** EcoRI site

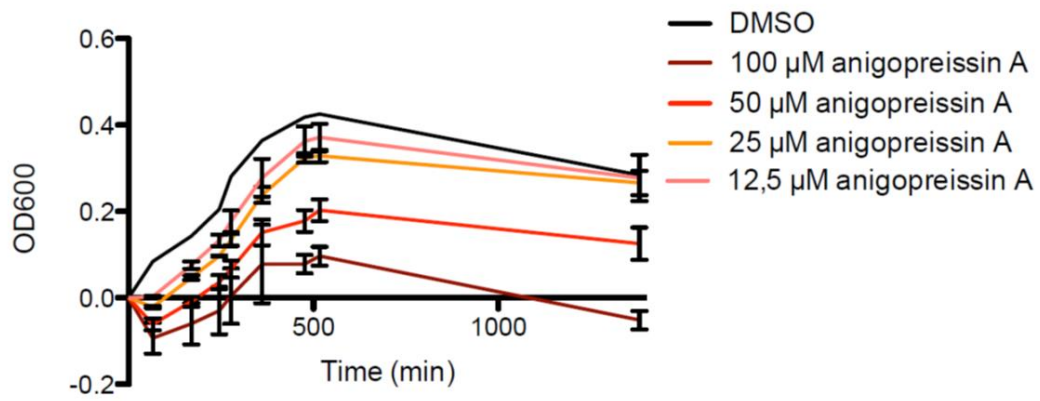

Figure S1. Inhibition of *Y. pseudotuberculosis* growth by anigopreissin A.

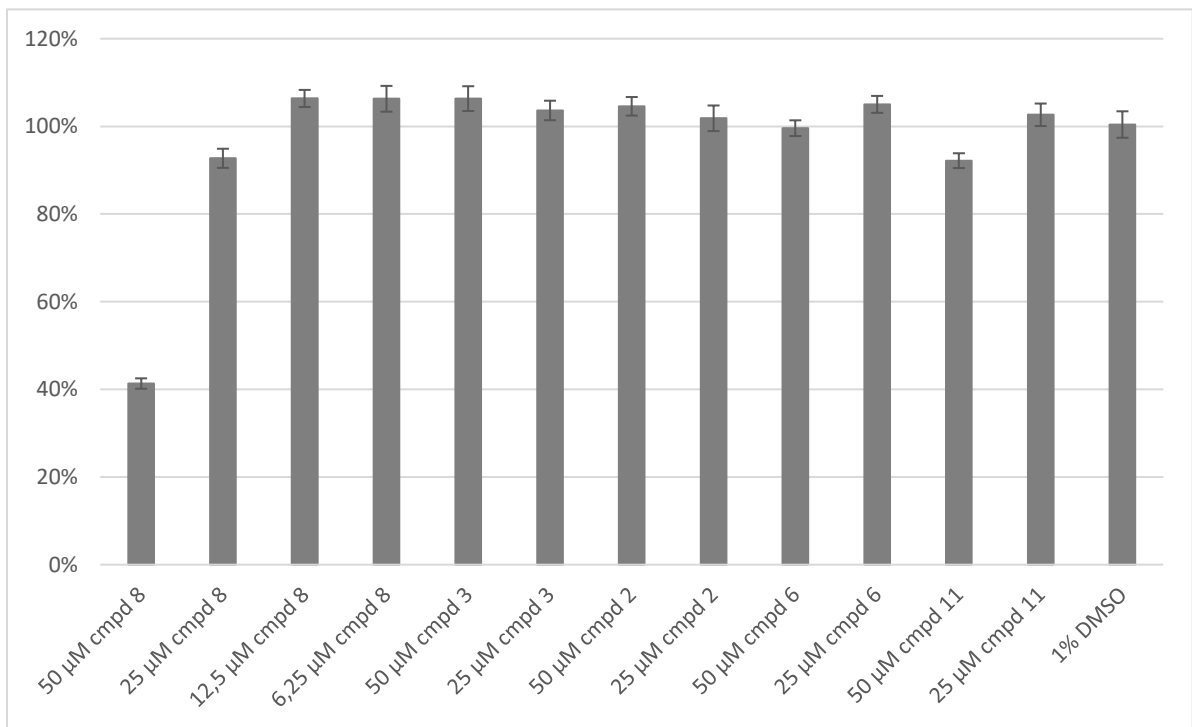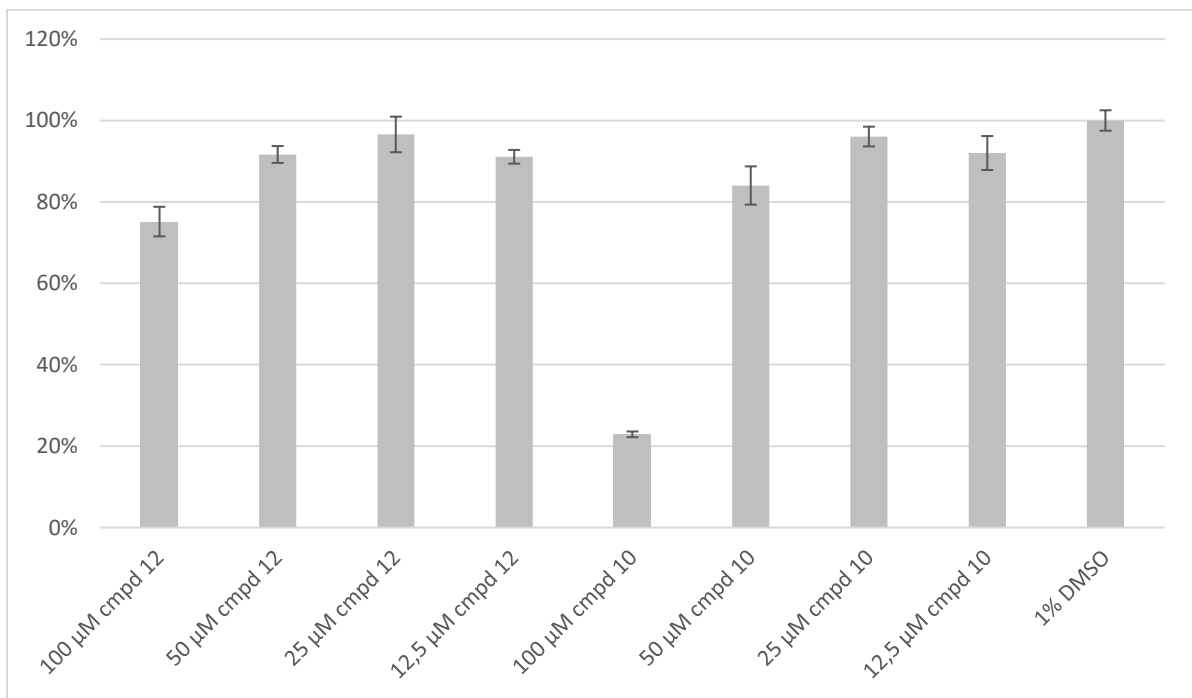

Figure S2. Toxicity towards J774 cells after 6 h.

|         | ctrl  | cmpd 8 | cmpd 8 | cmpd 8 | cmpd x | cmpd x | cmpd x | cmpd y | cmpd y | cmpd y |       |       |       |
|---------|-------|--------|--------|--------|--------|--------|--------|--------|--------|--------|-------|-------|-------|
| Plate 1 | 1     | 2      | 3      | 4      | 5      | 6      | 7      | 8      | 9      | 10     | 11    | 12    | μM    |
| A       | 45897 | 46712  | 1509   | 1580   | 1590   | 2402   | 2186   | 2448   | 2890   | 2122   | 2559  | 52157 | 100,0 |
| B       | 50332 | 40243  | 1521   | 1733   | 1651   | 3980   | 4154   | 4652   | 23223  | 6083   | 6200  | 50714 | 50,0  |
| C       | 51866 | 40643  | 1613   | 2008   | 1842   | 26774  | 31782  | 31862  | 37832  | 34600  | 37497 | 50704 | 25,0  |
| D       | 38027 | 41897  | 14134  | 14853  | 21438  | 35243  | 32780  | 37926  | 39539  | 41327  | 45301 | 50896 | 12,5  |
| E       | 1340  | 1693   | 28901  | 31184  | 31347  | 30403  | 34183  | 38190  | 36907  | 40086  | 42737 | 48173 | 6,3   |
| F       | 1370  | 1588   | 37007  | 38574  | 43412  | 42090  | 40836  | 42744  | 43279  | 45837  | 45141 | 49104 | 3,1   |
| G       | 1659  | 1562   | 42082  | 42533  | 41370  | 42613  | 42574  | 44876  | 47904  | 43074  | 44807 | 49384 | 1,6   |
| H       | 1652  | 1704   | 36700  | 41964  | 41229  | 38978  | 34984  | 34179  | 35121  | 31927  | 34387 | 47764 | -     |

Figure S3. Raw data of GFP measurement directly from plate reader showing the control strains PAK(pCS500) well B2-D2 and PAK<sub>exxA</sub>(pCS500) well E2-G2 and PAK(pCS500) with addition of compound 8 at 100-3.1 μM in triplicates B3-G5.

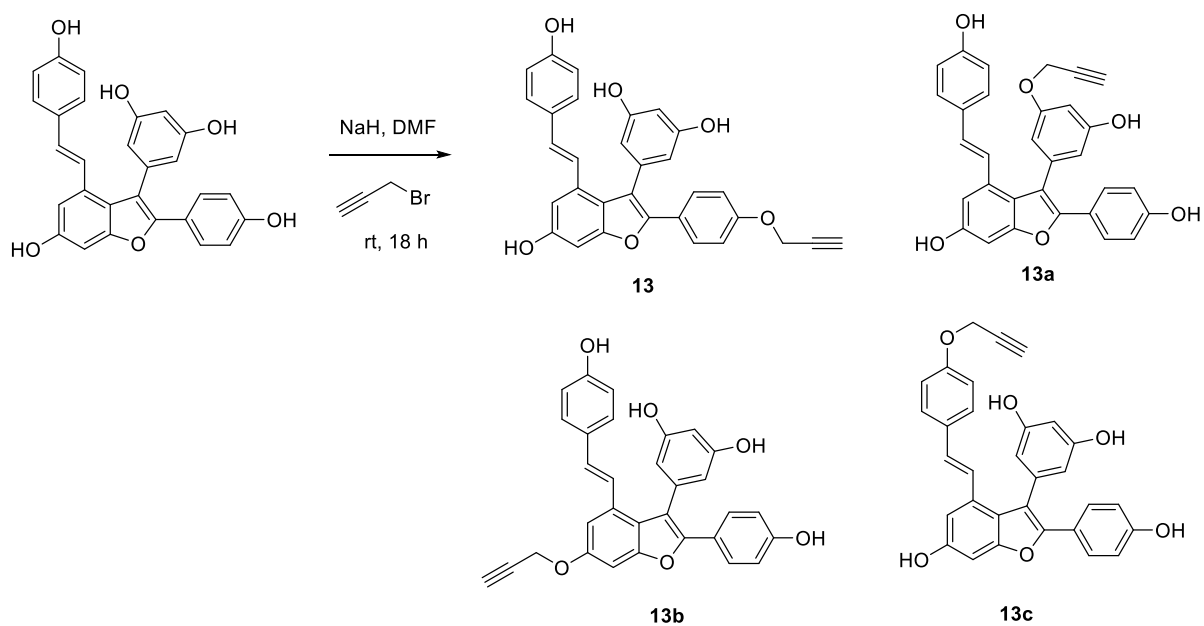

Figure S4. Synthesis of monopropargylated viniferifuran.

To a mixture of viniferifuran (120 mg, 0.26 mmol, 1 equiv.), TBAI (98 mg, 1 equiv.) in DMF (5 mL) at 0 °C, was added 60% NaH (32 mg, 3 equiv.). The reaction was stirred at 0 °C for 30 min and then a 80% weight solution of propargyl bromide in toluene (43  $\mu$ L, 1.5 equiv.) was added to the reaction mixture. The mixture was stirred at rt for overnight and then neutralized with 1 N HCl. The mixture was extracted with ethyl acetate. The organic phase was washed with H<sub>2</sub>O and brine, dried over MgSO<sub>4</sub>, filtered and concentrated to give a crude. The crude was purified by high performance liquid chromatography using a reversed-phase C-18 column and a gradient of 20-100% MeOH in H<sub>2</sub>O (both + 0.005% HCOOH) over 40 min to afford 4 major fractions of monoalkylated products whose structures were analysed by 2D NMR: 13c (fraction 1, 5 mg); 13 (fraction 2, 7 mg); mixture of 13a and 13 (fraction 3, 1 mg) and 13b (fraction 4, 5 mg). LCMS of mono propargylated product: ESI- [M-H]<sup>-</sup> for C<sub>31</sub>H<sub>21</sub>O<sub>6</sub> calculated 489.1, found 489.2.

Compound 13: <sup>1</sup>H NMR (600 MHz, Acetone-*d*<sub>6</sub>)  $\delta$  8.52 (br s, 4H), 7.59 (d, *J* = 9.0 Hz, 2H), 7.13 (d, *J* = 2.0 Hz, 1H), 7.07 (d, *J* = 8.5 Hz, 2H), 7.02 (d, *J* = 16.3 Hz, 1H), 6.98 (d, *J* = 9.0 Hz, 2H), 6.96 (d, *J* = 16.3 Hz, 1H), 6.92 (d, *J* = 2.0 Hz, 1H), 6.74 (d, *J* = 8.6 Hz, 2H), 6.61 (t, *J* = 2.2 Hz, 1H), 6.50 (d, *J* = 2.2 Hz, 2H), 4.81 (d, *J* = 2.4 Hz, 2H), 3.08 (t, *J* = 2.4 Hz, 1H). <sup>13</sup>C NMR (150 MHz, Acetone-*d*<sub>6</sub>)  $\delta$  161.5, 159.3, 159.1, 157.7, 157.0, 150.5, 138.9, 134.1, 131.1, 130.2, 129.7, 129.0, 126.2, 123.7, 123.0, 118.9, 117.2, 116.7, 110.8, 108.5, 104.2, 98.3, 80.6, 78.1, 57.3.

Compound 13b: <sup>1</sup>H NMR (600 MHz, Acetone-*d*<sub>6</sub>)  $\delta$  8.52 (br s, 4H), 7.51 (d, *J* = 8.9 Hz, 2H), 7.25 (d, *J* = 2.1 Hz, 1H), 7.14 (d, *J* = 2.1 Hz, 1H), 7.09 (d, *J* = 8.5 Hz, 2H), 7.07 (d, *J* = 16.3 Hz, 1H), 7.03 (d, *J* = 16.3 Hz, 1H), 6.81 (d, *J* = 8.9 Hz, 2H), 6.75 (d, *J* = 8.5 Hz, 2H), 6.60 (t, *J* = 2.2 Hz, 1H), 6.50 (d, *J* = 2.2 Hz, 2H), 4.91 (d, *J* = 2.4 Hz, 2H), 3.12 (t, *J* = 2.4 Hz, 1H). <sup>13</sup>C NMR (150 MHz, Acetone-*d*<sub>6</sub>)  $\delta$  161.5, 159.4, 159.1, 158.0, 156.5, 151.9, 138.8, 134.0, 131.1, 130.7, 129.7, 129.4, 124.4, 124.2, 123.4, 118.0, 117.3, 117.2, 110.9, 108.8, 104.2, 97.8, 80.9, 78.1, 58.0.

Compound 13c: <sup>1</sup>H NMR (600 MHz, Acetone-*d*<sub>6</sub>)  $\delta$  8.54 (br s, 4H), 7.49 (d, *J* = 8.8 Hz, 2H), 7.17 (d, *J* = 8.6 Hz, 2H), 7.13 (d, *J* = 2.0 Hz, 1H), 7.08 (d, *J* = 16.3 Hz, 1H), 6.99 (d, *J* = 16.3 Hz, 1H), 6.92 (d, *J* = 2.4 Hz, 2H), 6.90 (d, *J* = 2.0 Hz, 1H), 6.80 (d, *J* = 8.8 Hz, 2H), 6.60 (td, *J* = 2.2 Hz,

1H), 6.50 (d,  $J = 2.2$  Hz, 2H), 4.79 (d,  $J = 2.4$ Hz, 2H), 3.08 (t,  $J = 2.4$  Hz, 1H).  $^{13}\text{C}$  NMR (150 MHz, Acetone- $d_6$ )  $\delta$  161.4, 159.3, 159.2, 157.5, 156.9, 151.2, 139.0, 133.6, 133.0, 129.6, 129.4, 129.3, 124.9, 124.3, 118.0, 117.2, 116.8, 110.9, 108.6, 104.1, 98.6, 80.7, 78.0, 57.3.

Mixture of compound 13a and 13 (see  $^1\text{H}$  NMR spectrum below)



# Compound 13, $^1\text{H}$

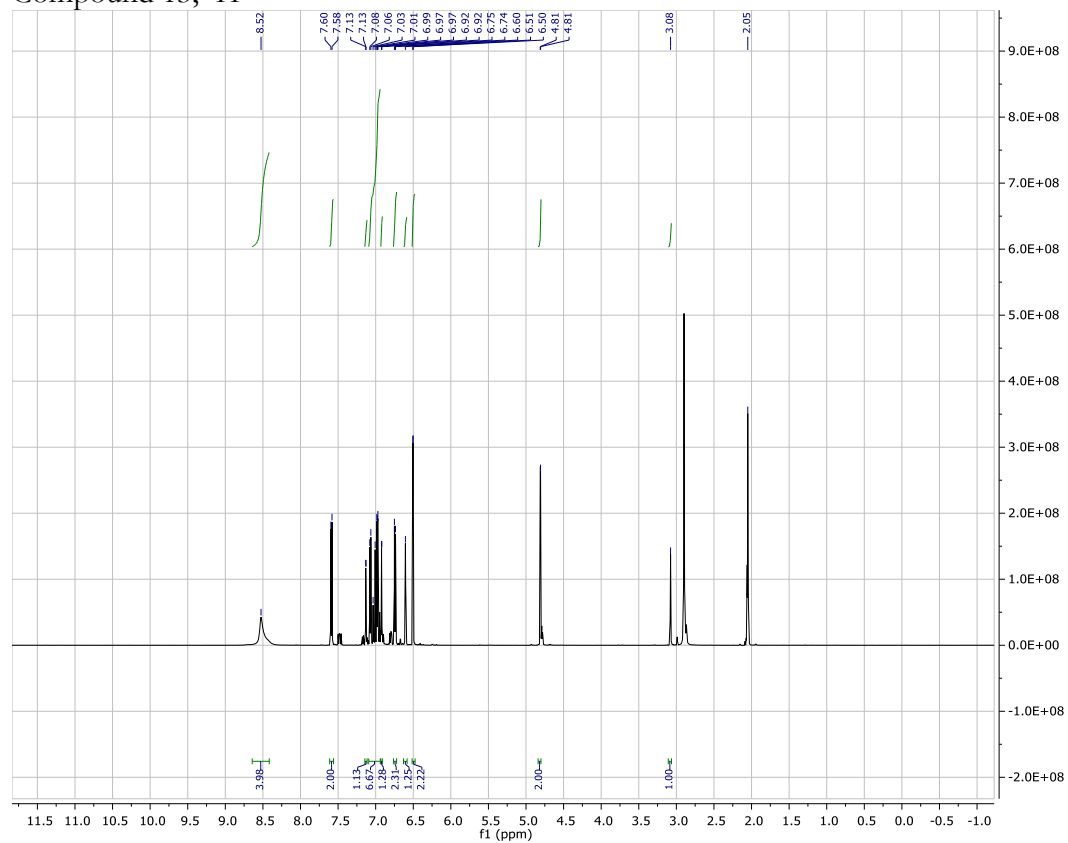

# Compound 13, $^{13}\text{C}$

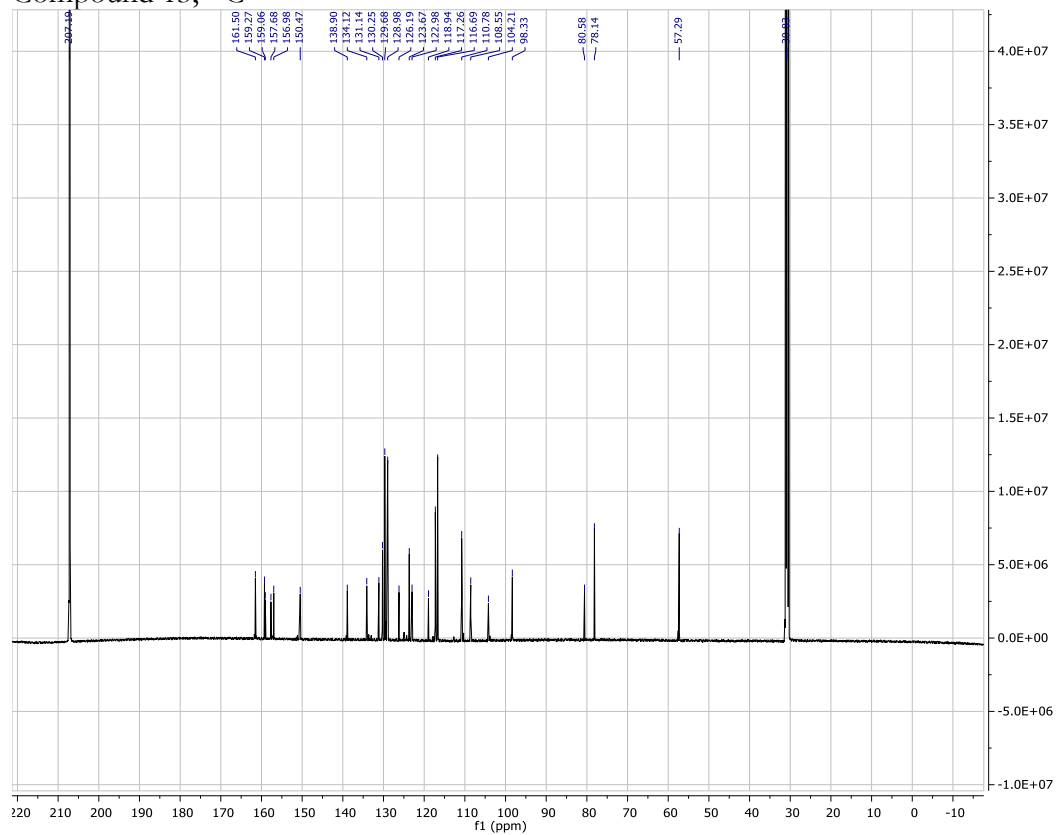

Compound 13b, <sup>1</sup>H

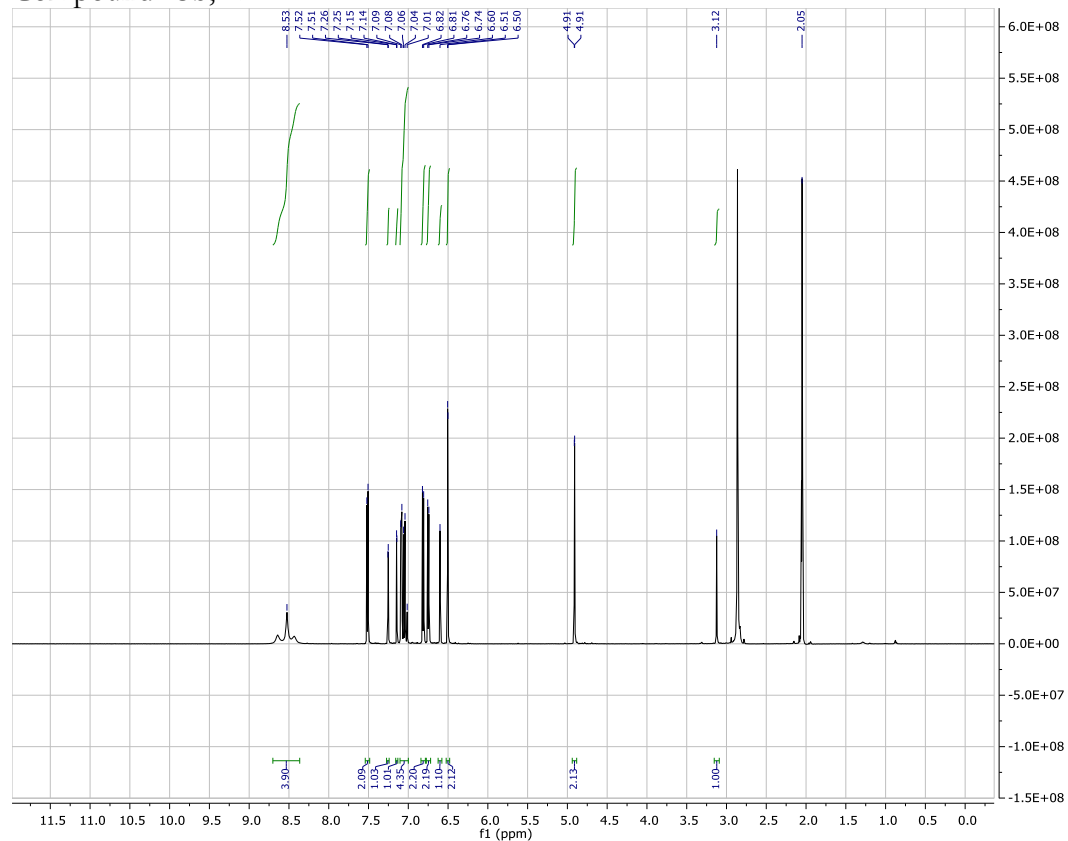

Compound 13b, <sup>13</sup>C

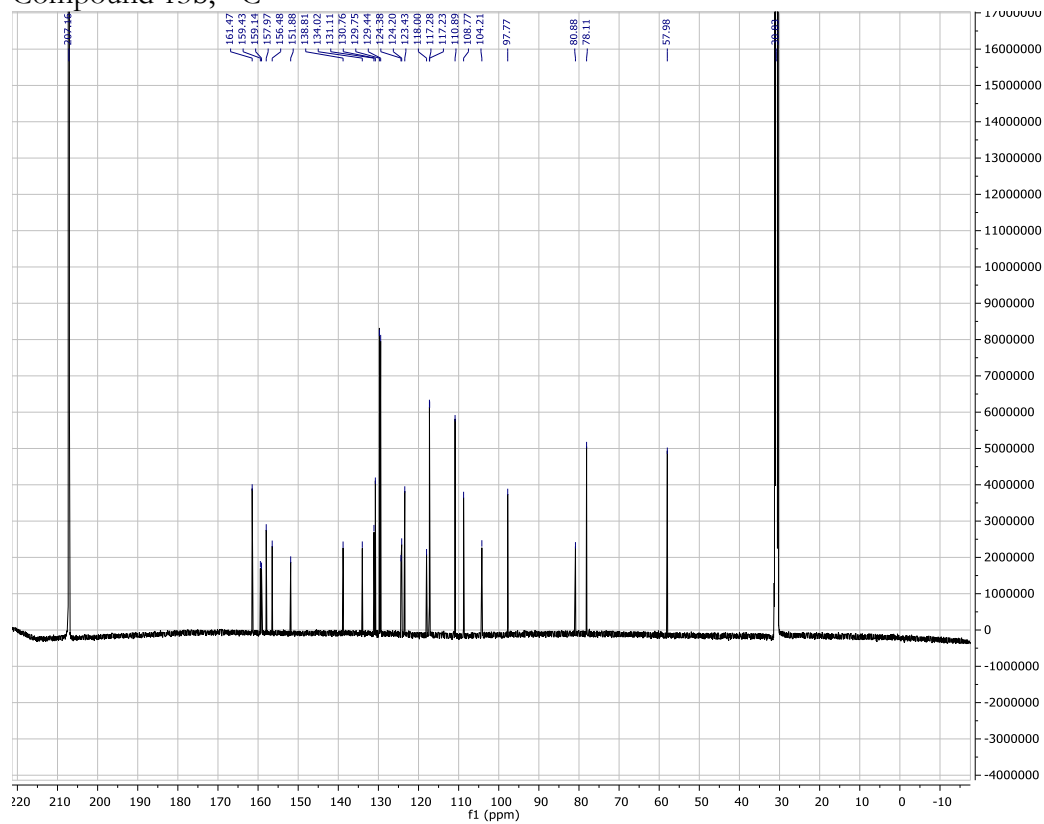

### Compound 13c, <sup>1</sup>H

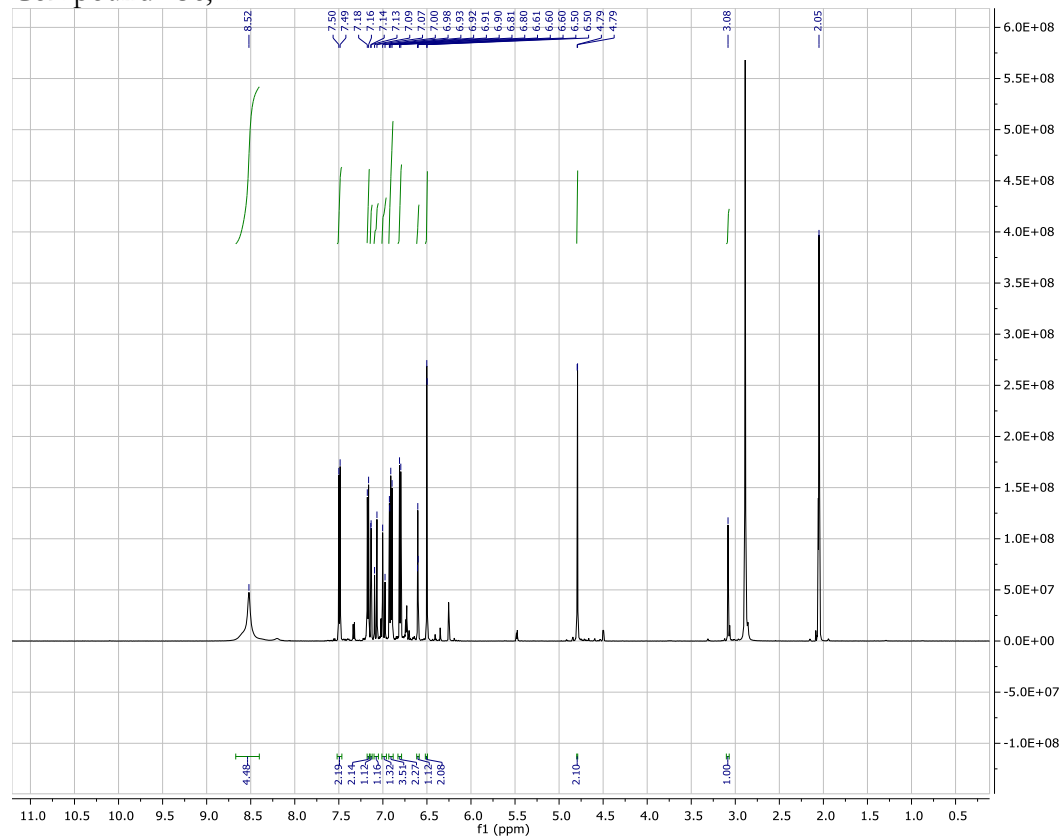

### Compound 13c, <sup>13</sup>C

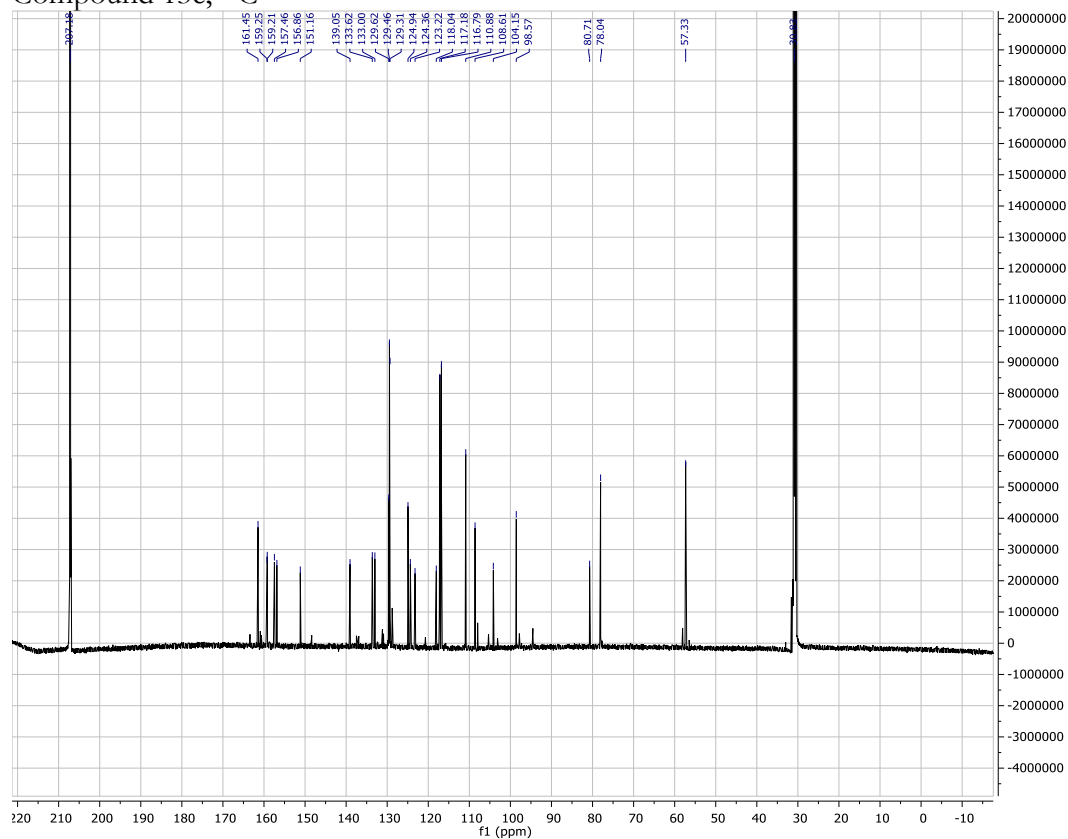



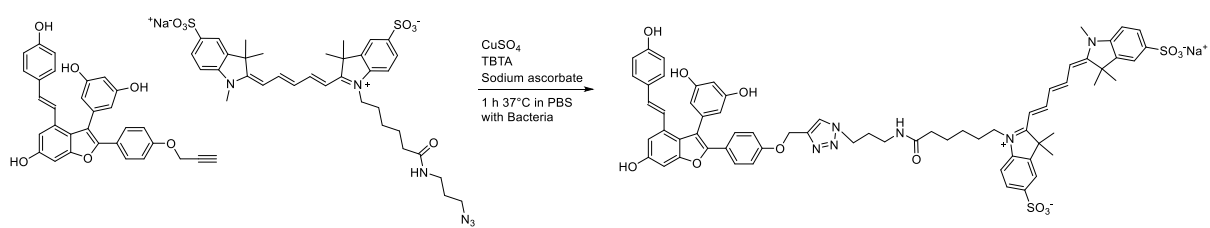

Figure S5. Click chemistry between compound 13 bound to bacteria and sulfonylethynyl azide.
